# Supplementary material
Source: PubMed Central journal article supplement (PMC4930744)

## Supplemental Data

### Supplemental Figure Legends

#### **Figure S1. Effects of Par3 on APP-CTF upon DAPT treatment.**

(a) APPwt cells (N2a cells stably expressing wild type hAPP695) and APPswe cells (N2a cells stably expressing hAPP695 with the Swedish mutation) were treated with 100nM DAPT for 12 hours. Distinct CTFs bands were shown by A8717 antibody (lower panel) and CTF $\beta$  was shown on 6E10 antibody (upper panel).

(b) APPwt cells were transfected with the indicated plasmids for 72 hours and treated with 100nM DAPT for another 12 hours. Lysates were subjected to Western blotting with the A8717 antibody to detect both CTF $\alpha$  and CTF $\beta$  bands.

(c) Quantification of CTF $\alpha$  normalized to GAPDH from blots in (b), \* $p < 0.05$ ,  $n = 3$ .

(d) Quantification of CTF $\beta$  normalized to GAPDH from blots in (b), \* $p < 0.05$ ,  $n = 3$ .

(e) Quantification the ratio of CTF $\beta$  and CTF $\alpha$  from blots in (b), \* $p < 0.05$ ,  $n = 3$ .

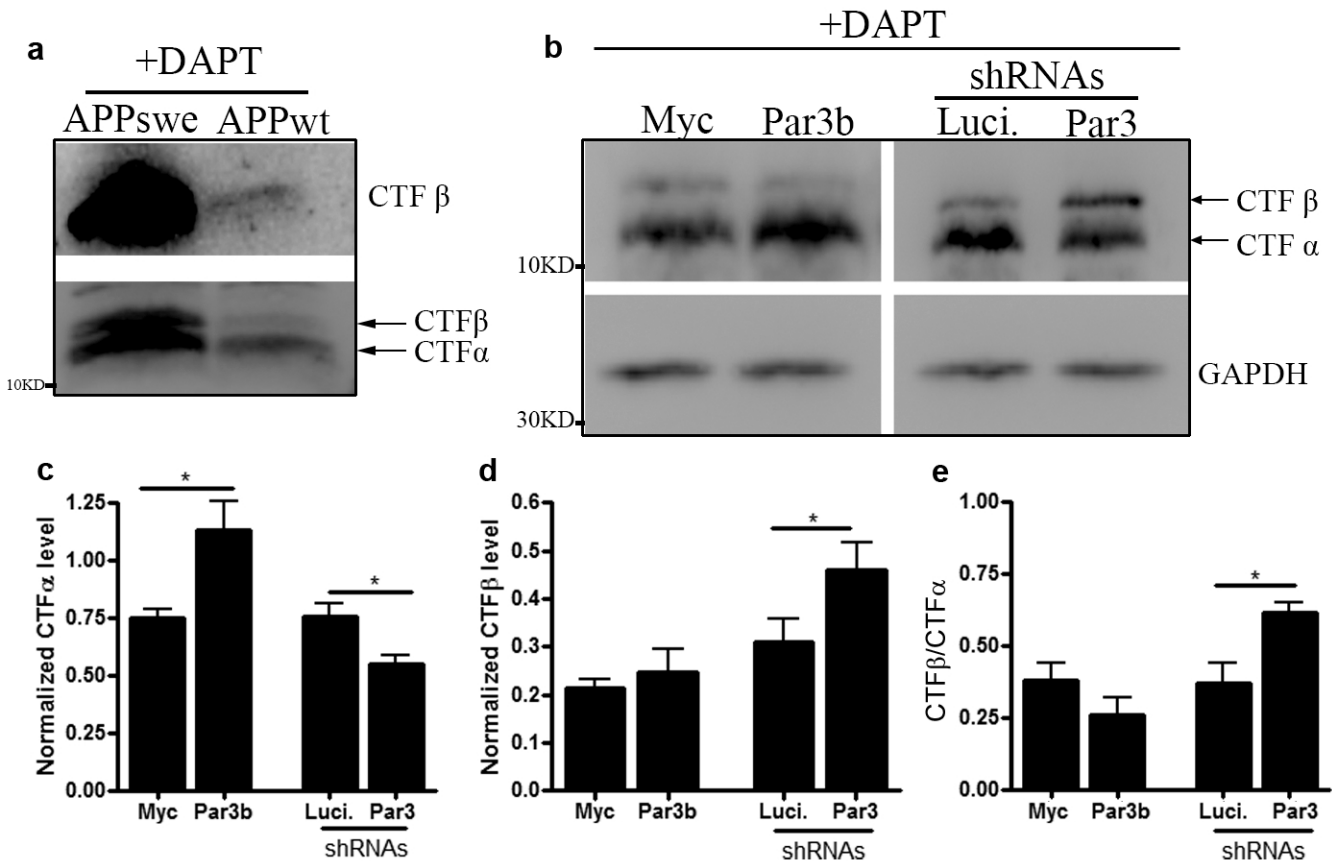

Supplement: NIHMS780828-supplement-Supplemental.pdf [file NIHMS780828-supplement-Supplemental.pdf]
